# Supplementary material for: Unique dual responsive activity of a platinum nanozyme stabilized by a green solvent: deep eutectic solvents
Source: Royal Society of Chemistry journal article supplement (doi:10.1039/c8nj01902a), 2018-01-01

### Supplementary Materials

#### **Unique dual responsive activity of platinum nanozyme stabilized by a green solvent: deep eutectic solvents.**

Henam Sylvia Devi <sup>a</sup>, Henam Premananda Singh<sup>b\*</sup>

<sup>a</sup>Functional Materials and Device Lab, Department of Electrical Engineering, IIT Delhi, Delhi-110016, India

<sup>b</sup>Department of Chemistry, National Institute of Technology, Imphal-795001, India

\*Author for correspondence, Email address: [henam\\_boynao@yahoo.co.in](mailto:henam_boynao@yahoo.co.in)

Contact No.: (+91) 8974303534

**Figure S1.** UV-Vis spectrum of the as-synthesized Pt particle; upper inset shows digital image for its aqueous dispersion.

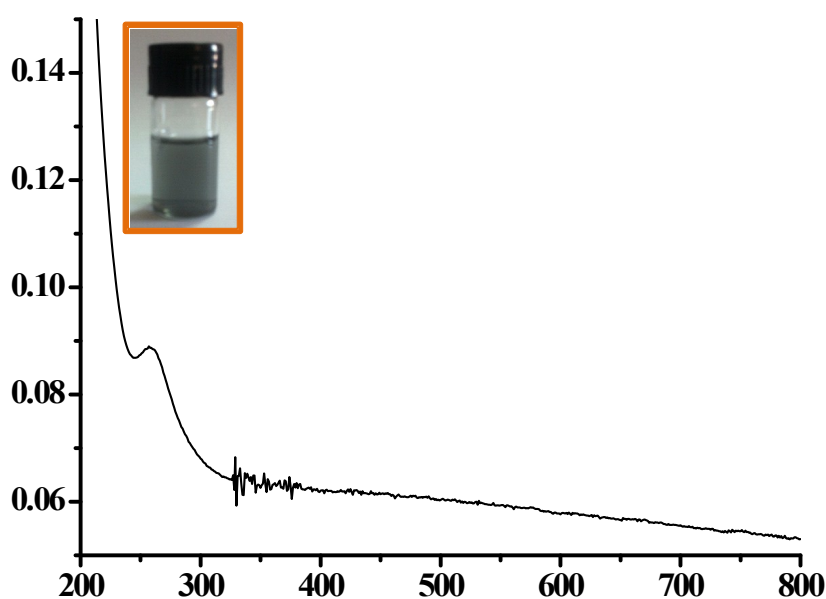

**Figure S2.** TEM micrograph of the Pt nanocubes at different scale.

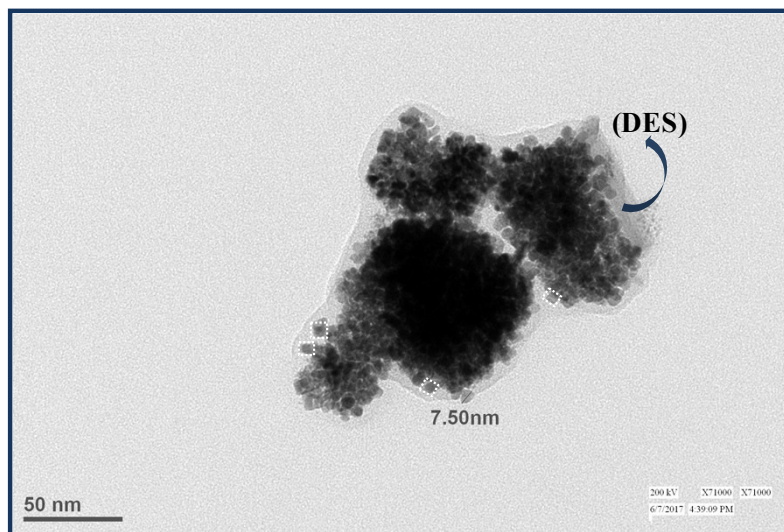

**Figure S3.** Time course UV-Vis absorption spectra for controlled reaction of  $\text{H}_2\text{O}_2$  with OPD; (A) in the absence, and (B) presence of Pt nanocubes. Experimental conditions: 200  $\mu\text{L}$  OPD ( $1 \times 10^{-2}$  M), 10  $\mu\text{L}$   $\text{H}_2\text{O}_2$  (30%v/v), 500  $\mu\text{L}$  nanocubes (0.3 mg/mL) at room temperature maintaining the total volume of the reaction mixture at 3 mL with DDW.

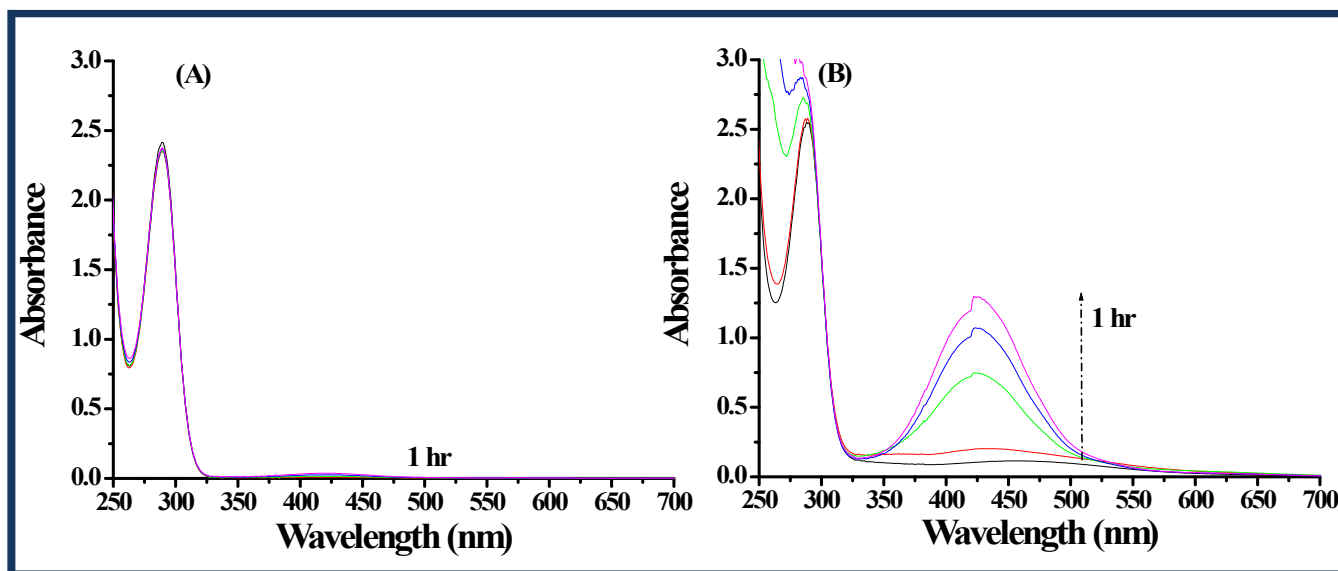

**Figure S4.** Possible mechanism underlining uricase mimetic of the as-synthesized Pt nanocube.

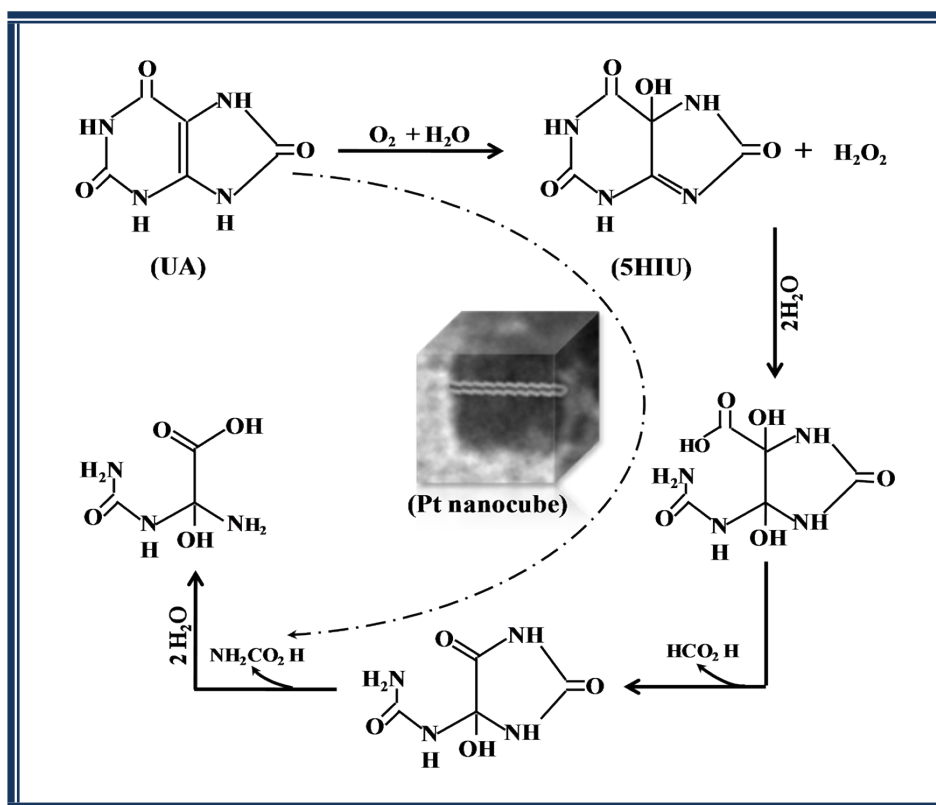

**Figure S5.** Illustration for proposed mechanism of peroxidase like activity of the Pt nanocube.

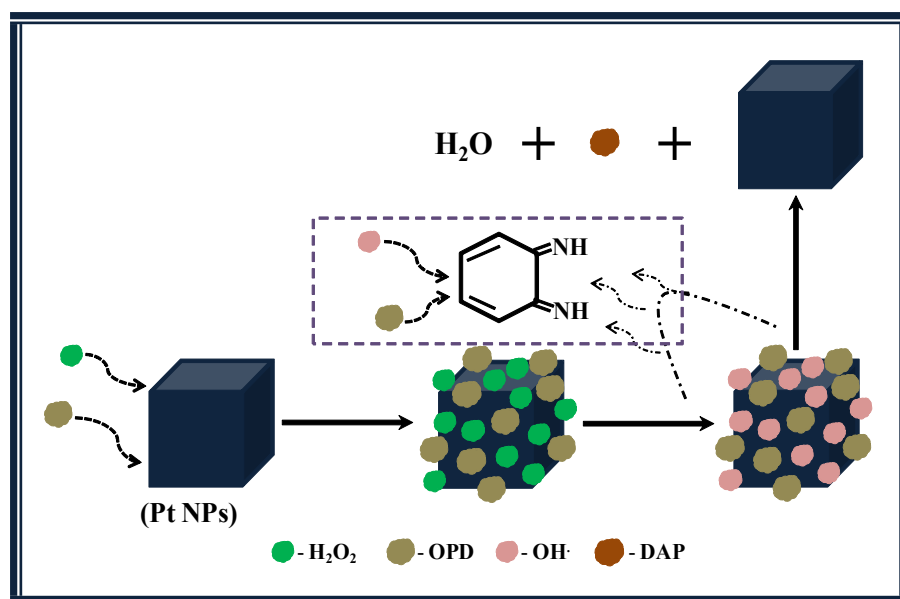

Supplement: c8nj01902a1.pdf [file c8nj01902a1.pdf]
